# Supplementary material for: Multiparental Mapping of Plant Height and Flowering Time QTL in Partially Isogenic Sorghum Families
Source: PubMed Central journal article supplement (PMC4169151; doi:10.1534/g3.114.013318), 2014-09-01
Supplement: supp_4.9.1593_013318SI.pdf [file supp_4.9.1593_013318SI.pdf]

## **Multi-parental mapping of plant height and flowering time QTL in partially isogenic sorghum families**

Higgins RH\*<sup>§1</sup>, Thurber CS<sup>§</sup>, Assaranurak I\*<sup>2</sup>, and Brown PJ\*<sup>§</sup>

\*Department of Crop Sciences, University of Illinois, Urbana, IL, USA 61801

<sup>§</sup>Energy Biosciences Institute, University of Illinois, Urbana, IL, USA 61801

<sup>1</sup>Current address: Department of Agronomy, Iowa State University, Ames, IA 50011

<sup>2</sup>Current address: Department of Plant Breeding and Genetics, Cornell University, Ithaca, NY 14850

Corresponding author: Patrick J Brown, 1408 IGB, 1206 W Gregory Drive, Urbana IL, 61801; (217)-333-8182; pjb34@illinois.edu

**DOI: 10.1534/g3.114.013318**

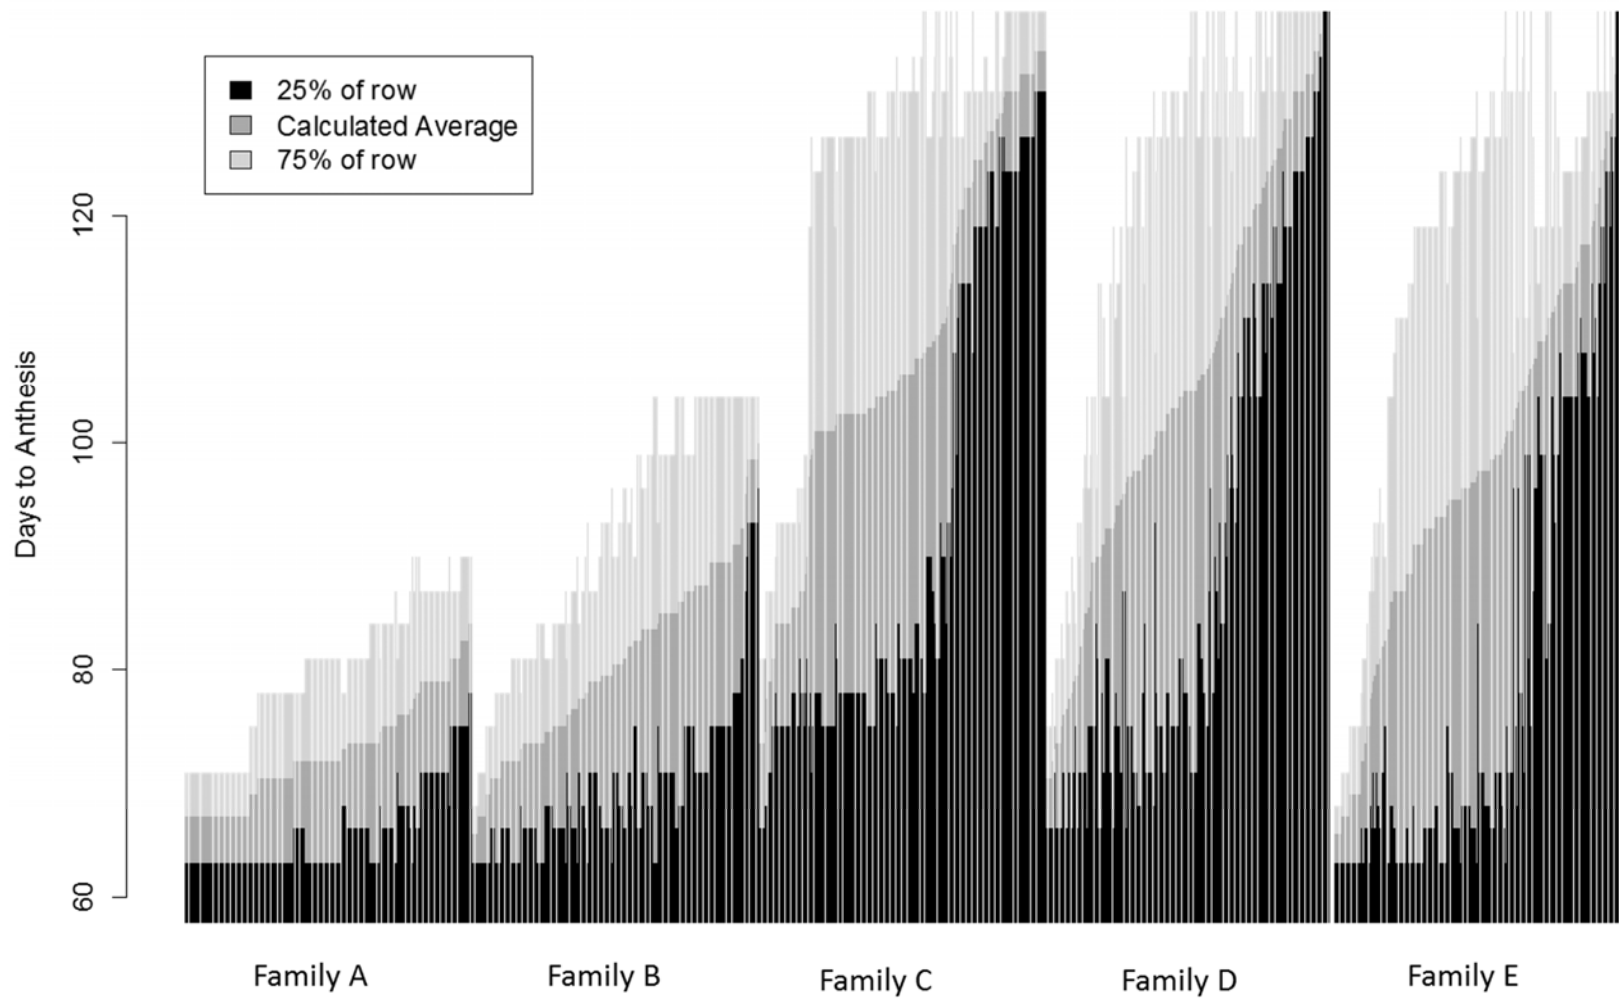

**Figure S1** Raw and calculated values for days to anthesis in the temperate environment (FL-IL).

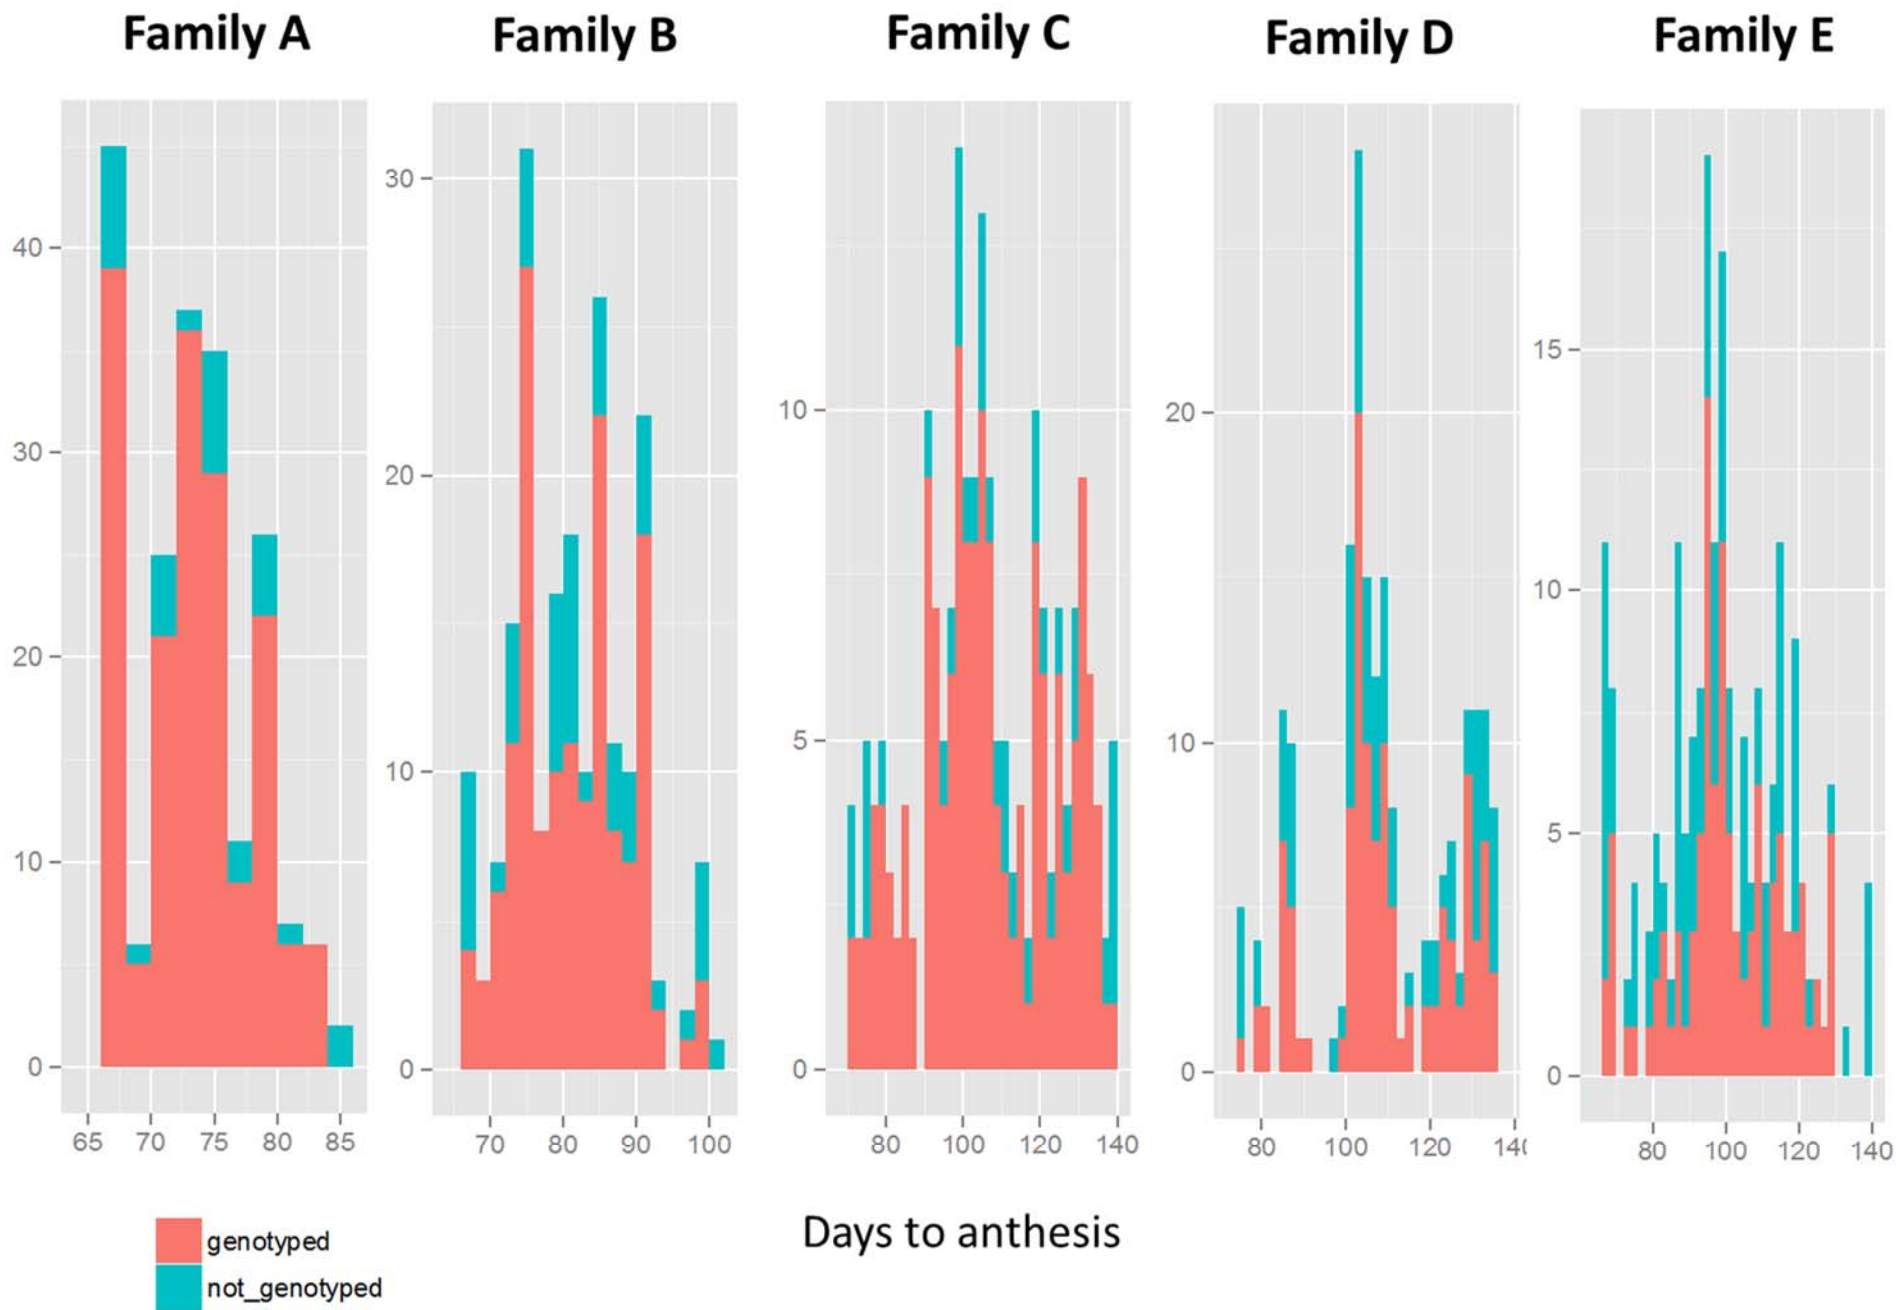

**Figure S2** Temperate flowering time (FL-IL) distributions of lines with and without genotype data in each family.

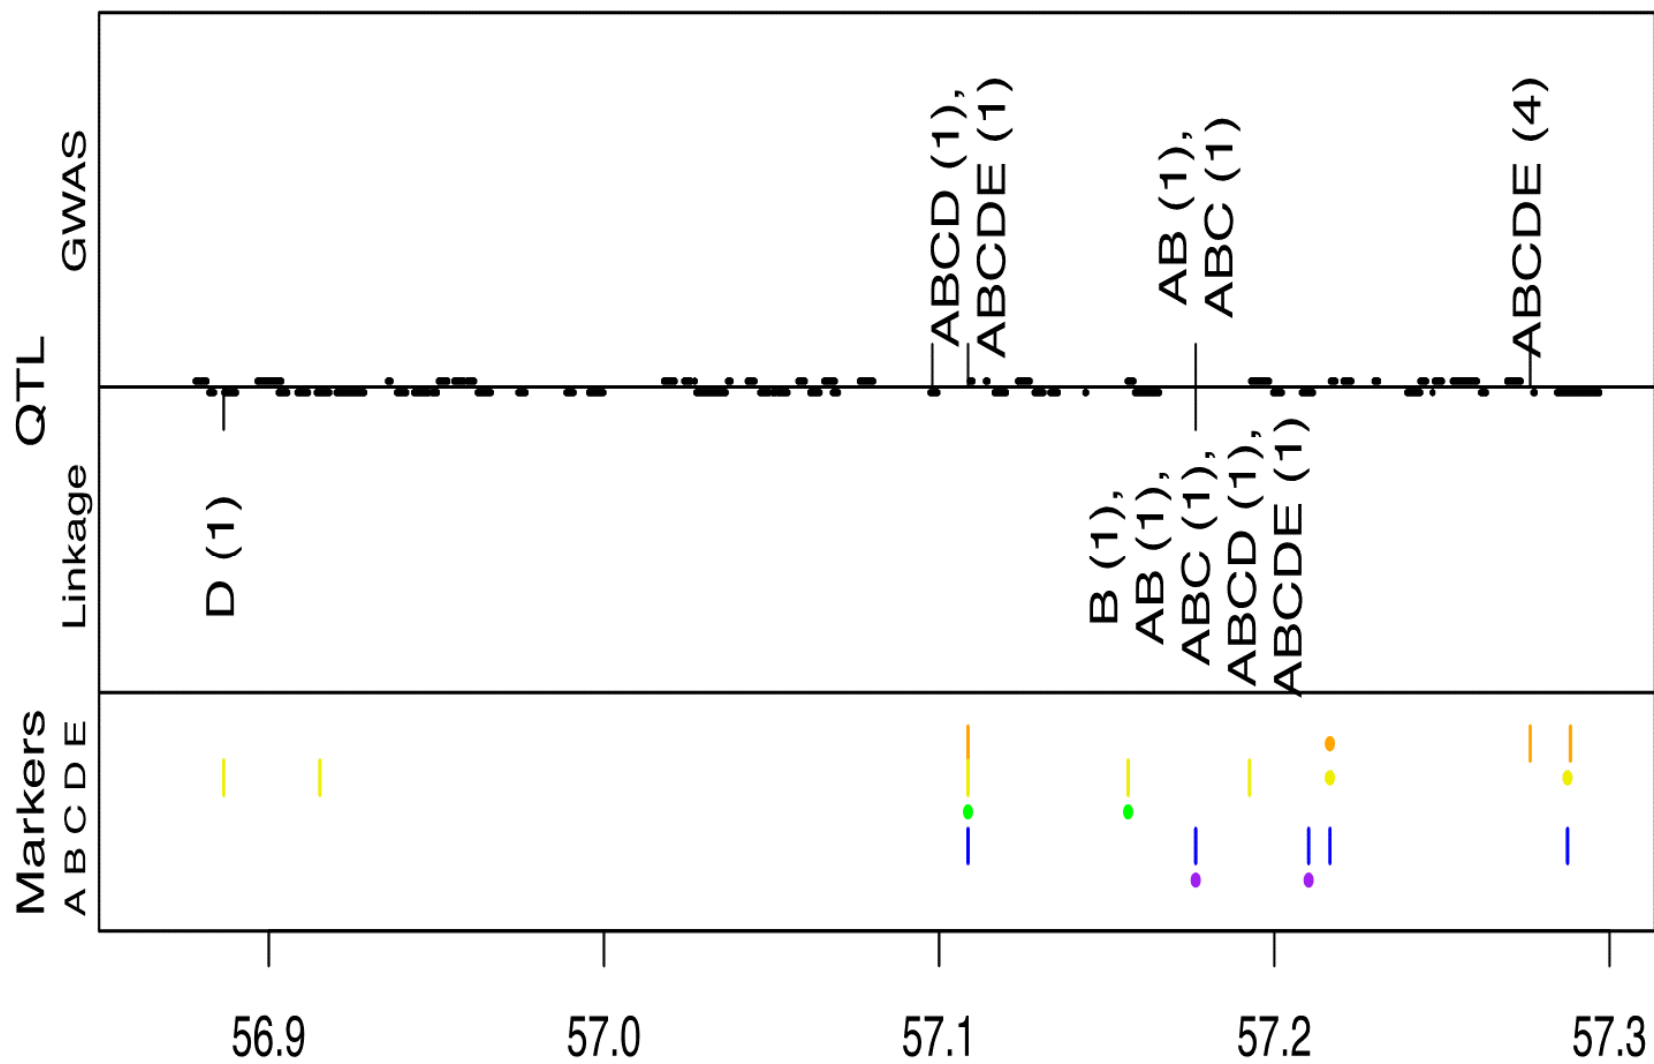

**Figure S3** QTL for tropical plant height (HT-MX) in the *Dw1* region of sorghum chromosome 9. Information in the top, middle, and bottom panels is the same as in Figure 4.

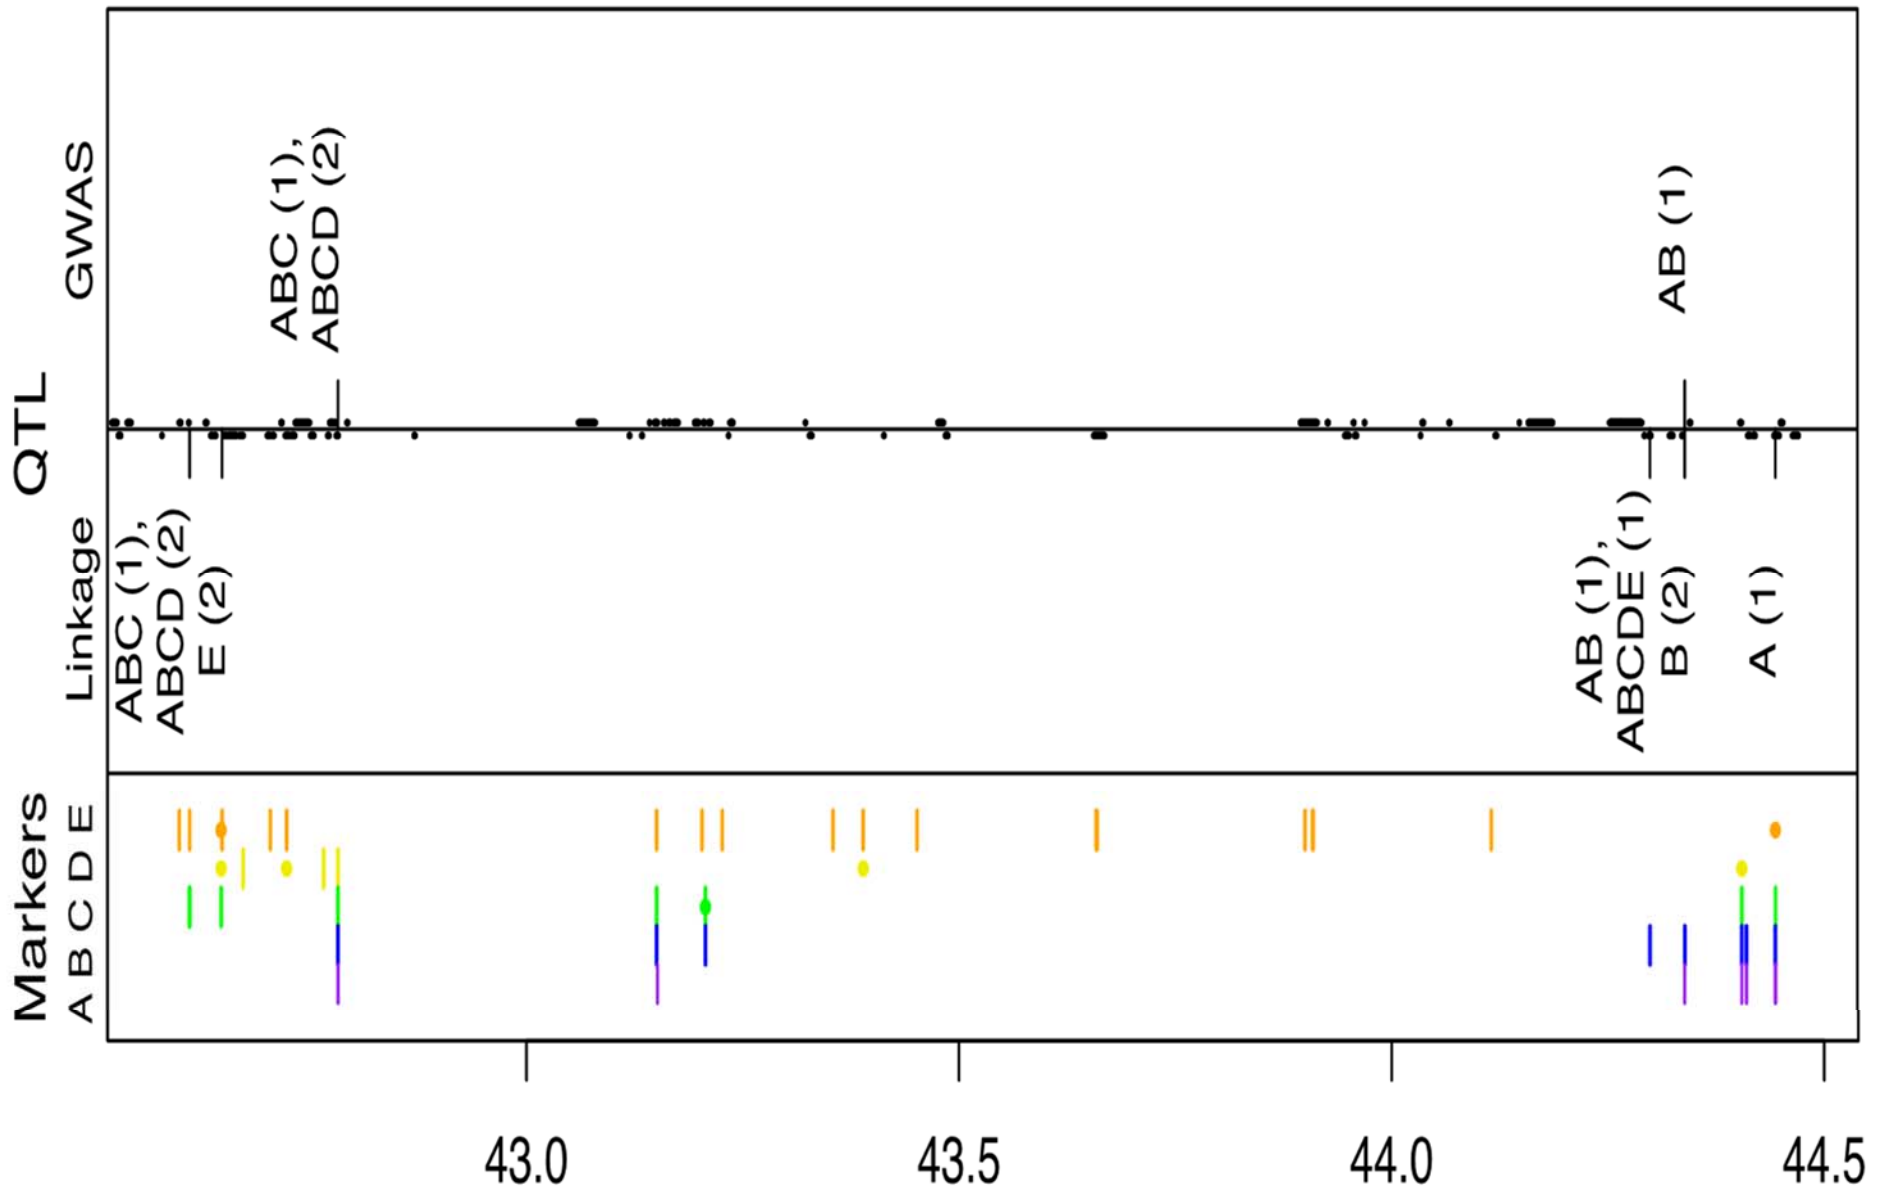

**Figure S4** QTL for temperate plant height (HT-IL) in the *Dw2* region of sorghum chromosome 6. Information in the top, middle, and bottom panels is the same as in Figure 4.

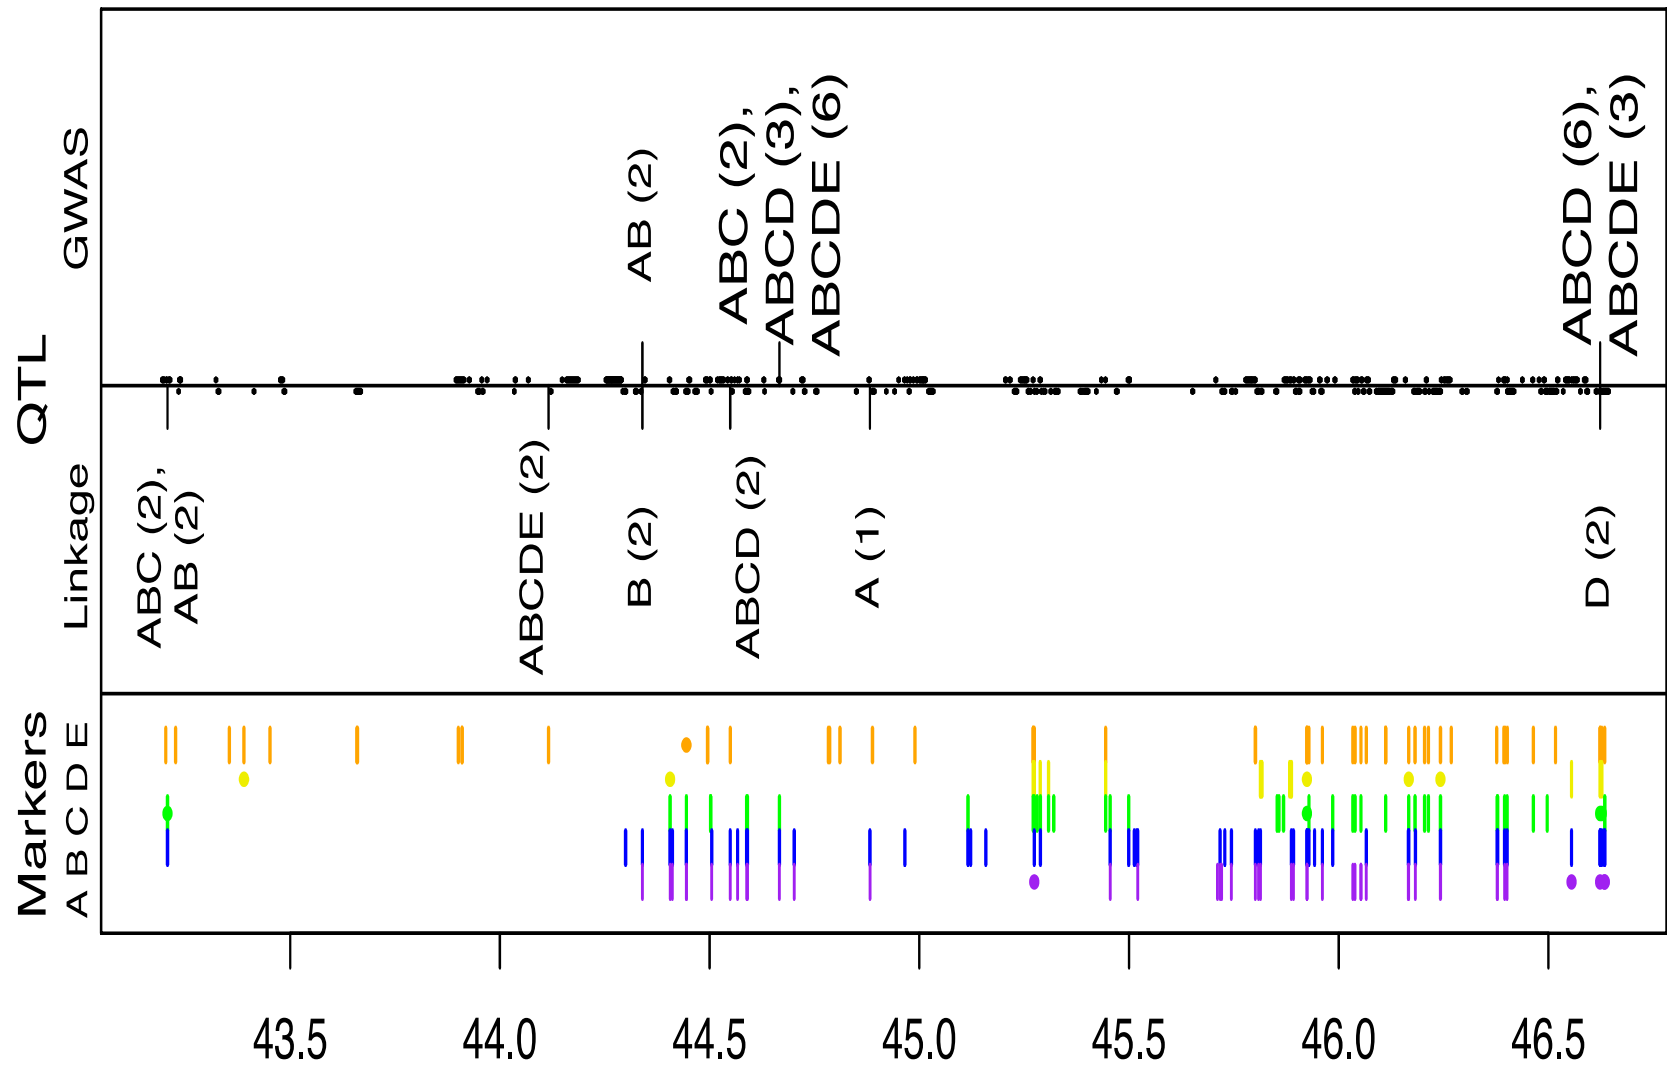

**Figure S5** QTL for tropical plant height (HT-MX) in the *Dw2* region of sorghum chromosome 6. Information in the top, middle, and bottom panels is the same as in Figure 4.

**Tables S1-S5**

Available for download as Excel files at <http://www.g3journal.org/lookup/suppl/doi:10.1534/g3.114.013318/-/DC1>

**Table S1 Segregation of 9139 SNPs across families A-E.** Marker segregation by family: 0 = fixed for reference allele, 1 = segregating; 2 = fixed for alternate allele.

**Table S2 Raw and modeled phenotypes.** Raw phenotypic data ("*\_raw*") and phenotypic values used for QTL analysis ("*\_out*"). For FL-IL, days at which each row reached 25% and 75% anthesis are also shown.

**Table S3 Phenotypic variance components.** REML estimates of variance components for each phenotype, obtained using the `lmer()` function in R

**Table S4 QTL models.** Markers and p-values for each step in each QTL model.

**Table S5 Raw genotypes.** Genotypes used for QTL analysis. 0= fixed for reference allele; 1=heterozygous; 2= fixed for alternate allele; NA = missing.
