# Supplementary material for: Multiparental Mapping of Plant Height and Flowering Time QTL in Partially Isogenic Sorghum Families
Source: PubMed Central journal article supplement (PMC4169151; doi:10.1534/g3.114.013318), 2014-09-01
Supplement: supp_4.9.1593_FigureS2.pdf [file supp_4.9.1593_FigureS2.pdf]

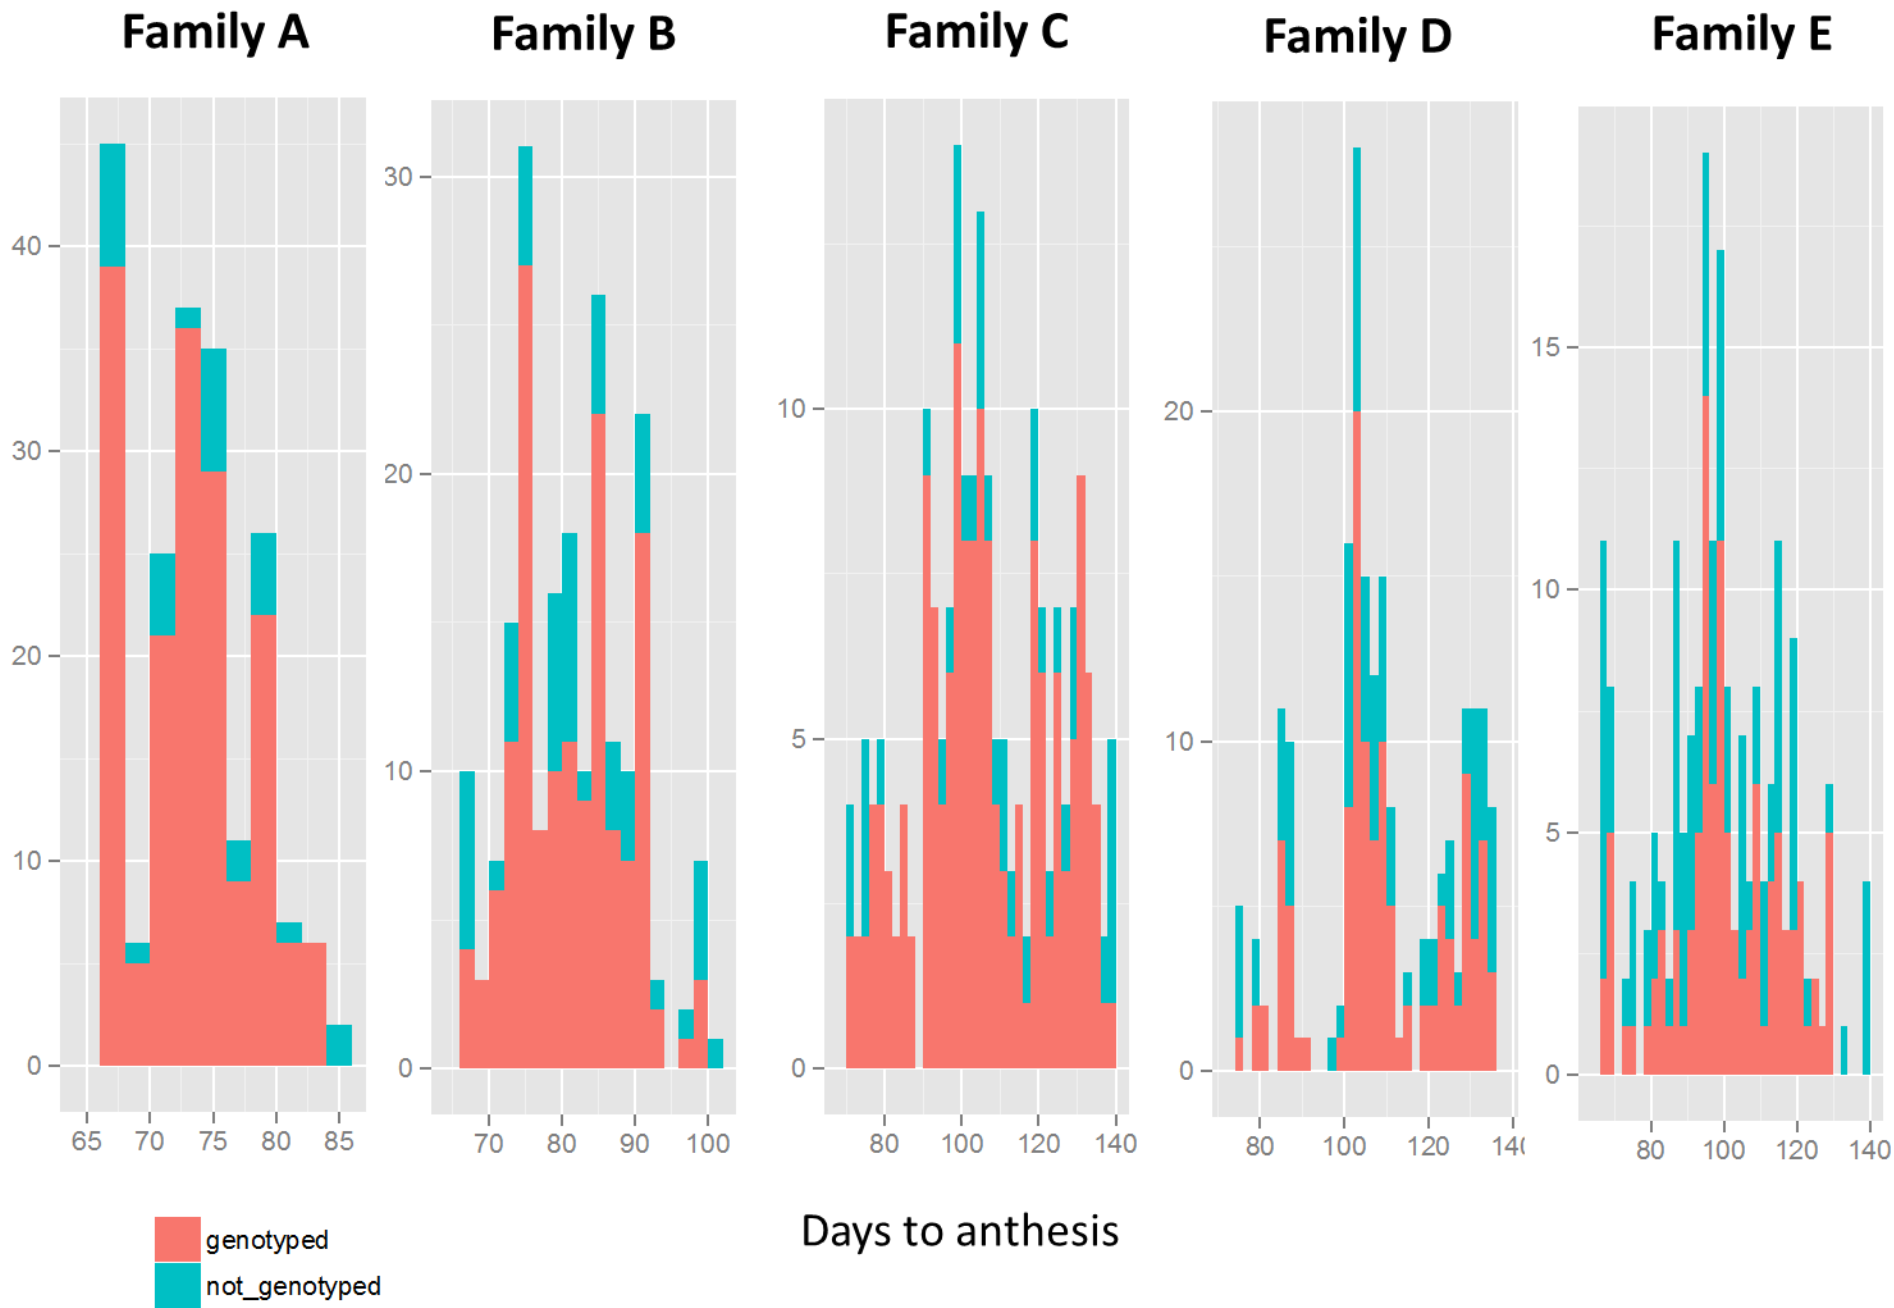

**Figure S2** Temperate flowering time (FL-IL) distributions of lines with and without genotype data in each family.
