# Supplementary material for: Multiparental Mapping of Plant Height and Flowering Time QTL in Partially Isogenic Sorghum Families
Source: PubMed Central journal article supplement (PMC4169151; doi:10.1534/g3.114.013318), 2014-09-01
Supplement: supp_4.9.1593_FigureS3.pdf [file supp_4.9.1593_FigureS3.pdf]

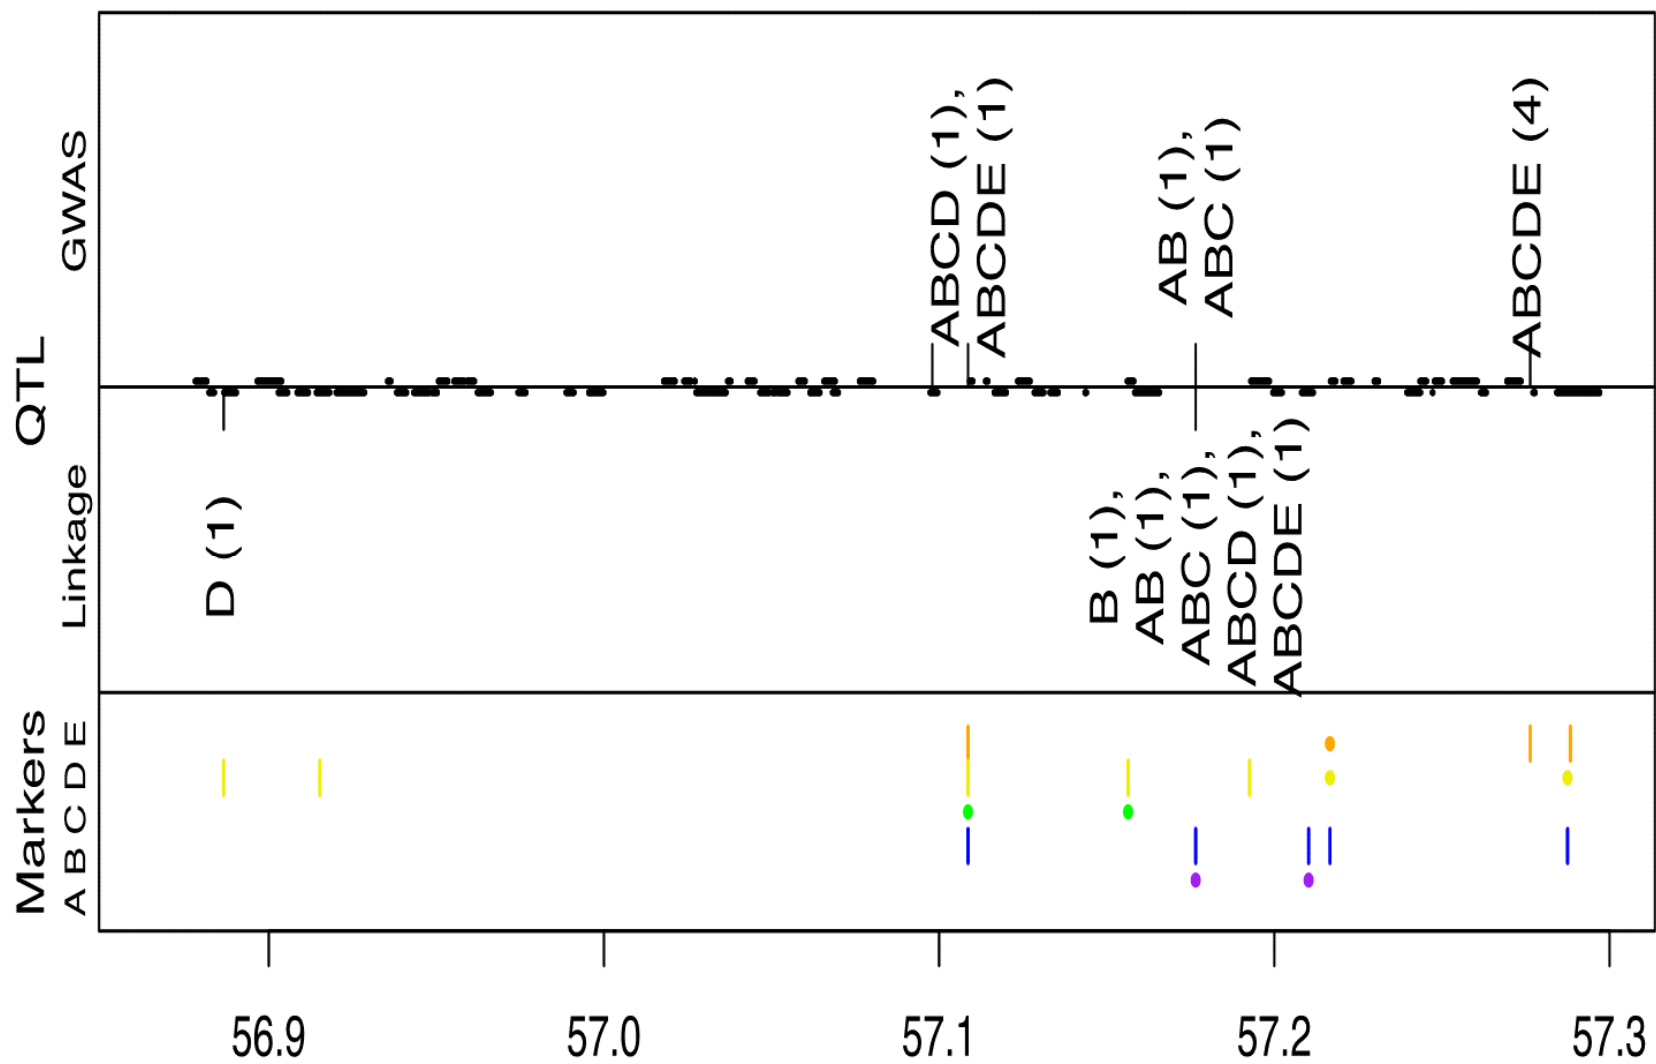

**Figure S3** QTL for tropical plant height (HT-MX) in the *Dw1* region of sorghum chromosome 9. Information in the top, middle, and bottom panels is the same as in Figure 4.
