# Supplementary material for: Multiparental Mapping of Plant Height and Flowering Time QTL in Partially Isogenic Sorghum Families
Source: PubMed Central journal article supplement (PMC4169151; doi:10.1534/g3.114.013318), 2014-09-01
Supplement: supp_4.9.1593_FigureS4.pdf [file supp_4.9.1593_FigureS4.pdf]

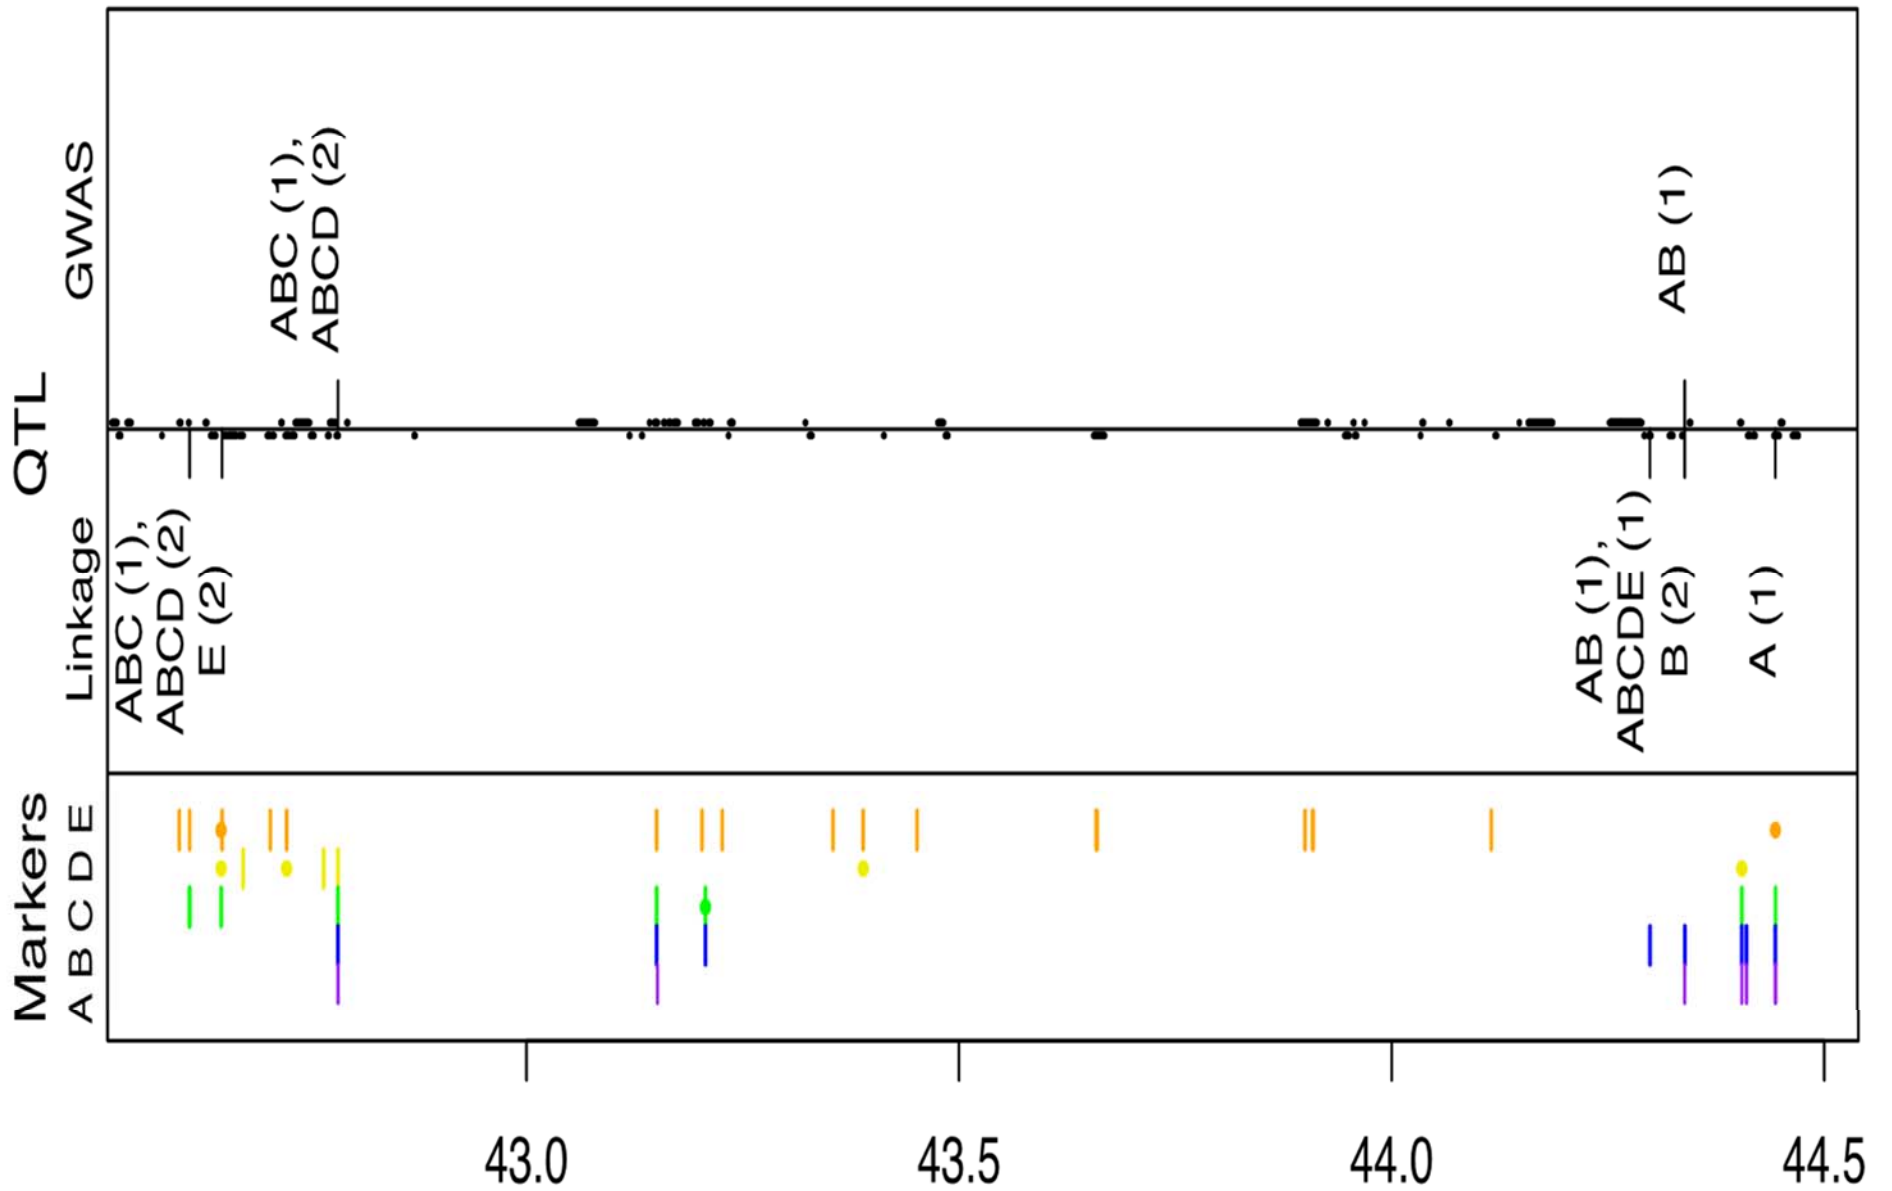

**Figure S4** QTL for temperate plant height (HT-IL) in the *Dw2* region of sorghum chromosome 6. Information in the top, middle, and bottom panels is the same as in Figure 4.
